# Supplementary material for: Local melatonin application induces cold tolerance in distant organs of Citrullus lanatus L. via long distance transport
Source: PubMed Central journal article supplement (PMC5244382; doi:10.1038/srep40858), 2017-01-19

**Title:**

**Local melatonin application induces cold tolerance in distant organs of *Citrullus lanatus* L. via long distance transport**

**Authors:**

Hao Li<sup>1†</sup>, Jingjing Chang<sup>1†</sup>, Junxian Zheng<sup>1</sup>, Yuchuan Dong<sup>1</sup>, Qiyang Liu<sup>1</sup>, Xiaozhen Yang<sup>1</sup>, Chunhua Wei<sup>1</sup>, Yong Zhang<sup>1</sup>, Jianxiang Ma<sup>1</sup> & Xian Zhang<sup>1\*</sup>

<sup>1</sup>*Department of Horticulture, Northwest A&F University, Taicheng Road 3, Yangling 712100, Shaanxi, P.R. China*

<sup>†</sup>*These authors contributed equally to this work.*

<sup>\*</sup>*To whom correspondence should be addressed. Email: zhangxian098@126.com*

**Table S1.** Primers used for qRT-PCR assays. F indicates forward and R indicates reverse.

| Gene                         | Primer pairs (5'-3')     |
|------------------------------|--------------------------|
| <i>β-actin</i> (Cla007792)   | F: CCATGTATGTTGCCATCCAG  |
|                              | R: GGATAGCATGGGGTAGAGCA  |
| <i>CDPK18</i> (Cla014285)    | F: GCCATGAGAATGTGGTTCAG  |
|                              | R: CAGCTGCATCTTTCTCGGTA  |
| <i>MAPK16</i> (Cla009366)    | F: AGGCCACAAGTGGATAGGAC  |
|                              | R: GCAACACAGAGCCAACAAC   |
| <i>RBOH</i> (Cla011409)      | F: CTTGCCAAGGATGGGTATCT  |
|                              | R: TTCGACTCAAAGCATCGAAC  |
| <i>RBOH-like</i> (Cla017196) | F: AAATCACCCCTCGATATTCGC |
|                              | R: TGCTCGGAAAGAGGAAGATT  |
| <i>ERF</i> (Cla002237)       | F: GGTTTCCAAGGAGAAATCCA  |
|                              | R: TGCCATTGTTGTTGTTGTTG  |
| <i>BZIP</i> (Cla023484)      | F: AACAAATGGAGGACGAAGGTC |
|                              | R: TCGCATCCAACATACTTGGT  |
| <i>Myb-like</i> (Cla017337)  | F: GGAAGAACCGACAACGAAAT  |
|                              | R: ATTCCAGCCTCATAGCGTCT  |
| <i>BHLH</i> (Cla010890)      | F: CATCTGTTCTTCTGGAGGCA  |
|                              | R: GACATAGGCCTCTGCTCCTC  |
| <i>WRKY4</i> (Cla017213)     | F: CCTCCAACCCAAGATTTGAC  |
|                              | R: TTCGTTAAGGAAGAGGCCAT  |
| <i>HSF</i> (Cla000713)       | F: CCCTTCCTCACCAAGACCTA  |
|                              | R: ATGAAGGTAGAGCCCGATTG  |

**Table S2.** Reads abundance of various classifications of mRNAs in control plants (CK) and plants treated with melatonin (MT), Cold, and melatonin+cold (MT-C).

| Sample Name | Raw Reads Num | Clean Reads Num | rRNA | Unique Mapped Reads | Multiple Mapped reads | Kown Gene Num | New Gene Num | All Gene Num |
|-------------|---------------|-----------------|------|---------------------|-----------------------|---------------|--------------|--------------|
| CK-1        | 40326590      | 39919518        | 5534 | 36775488            | 490772                | 16484         | 492          | 16976        |
| CK-2        | 38043848      | 37592838        | 4218 | 34451398            | 403064                | 16341         | 494          | 16385        |
| MT-1        | 37704638      | 37288558        | 3796 | 34117719            | 471554                | 16377         | 490          | 16876        |
| MT-2        | 36489514      | 36068804        | 3808 | 33058872            | 517732                | 16321         | 492          | 16813        |
| Cold-1      | 36122786      | 35809268        | 7762 | 32579557            | 651900                | 16216         | 476          | 16692        |
| Cold-2      | 35953956      | 35601736        | 4852 | 32616553            | 379044                | 16068         | 486          | 16554        |
| MT-C-1      | 32845006      | 32532788        | 3890 | 29881207            | 383710                | 16146         | 479          | 16625        |
| MT-C -2     | 33262622      | 30835220        | 6650 | 28069430            | 429846                | 16234         | 479          | 16713        |

**Figure S1.** The correlation of gene expression between two biological repeats in melatonin and, or cold treatments.

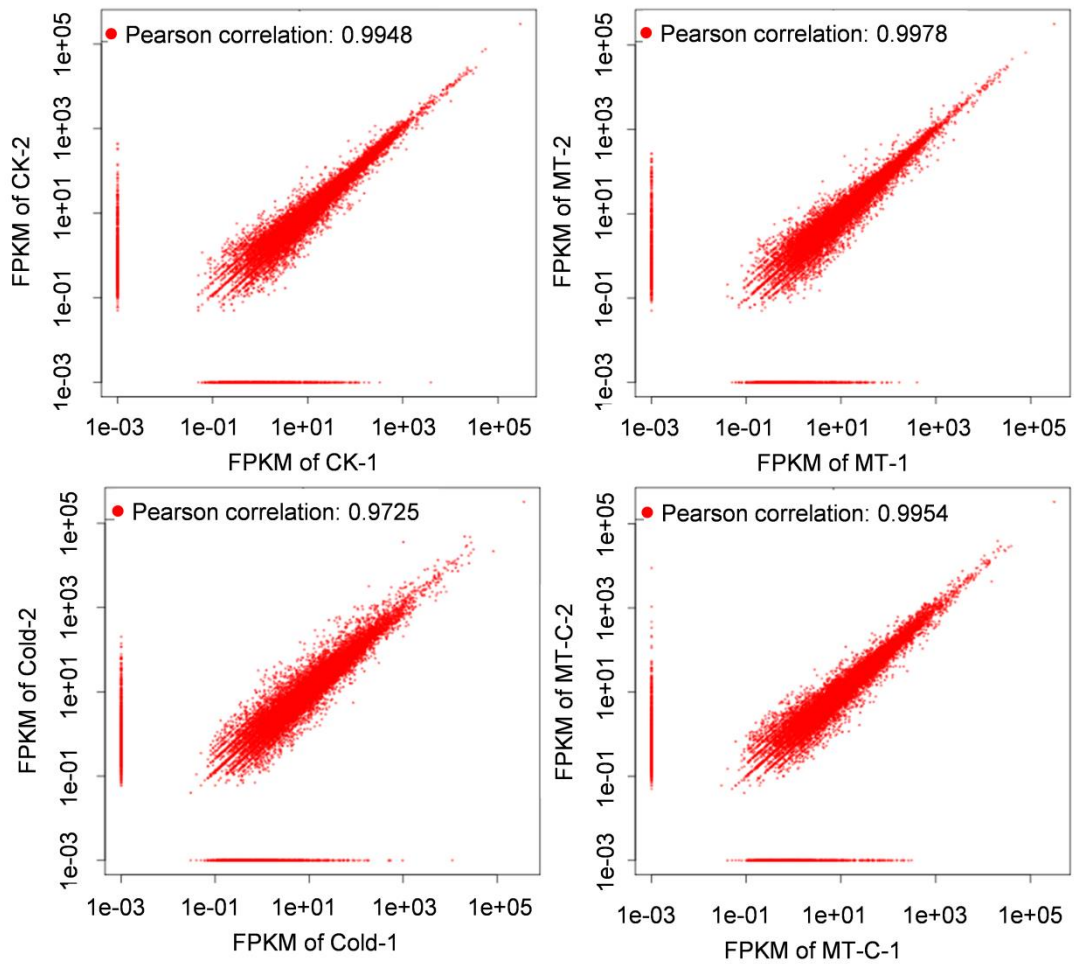

Supplement: srep40858-s1.pdf [file srep40858-s1.pdf]
